# Supplementary material
Source: HighWire-hosted journal article supplement (https://www.jrheum.org/highwire/filestream/33980/field_highwire_adjunct_files/0/170973DataSuppl.pdf)
Supplement: 170973DataSuppl.pdf [file 170973DataSuppl.pdf]

**Supplementary Table 1.** Description of plasma glucose testing.

|                                                                                                                            | <b>RA cohort<br/>(n = 22,624)</b> | <b>General Pop<br/>(n = 22,579)</b> |
|----------------------------------------------------------------------------------------------------------------------------|-----------------------------------|-------------------------------------|
| <b>Number of tests per patient year,<br/>[median (Q1, Q3)]</b>                                                             | 0.49 (0.25, 0.78)*                | 0.46 (0.22, 0.73)*                  |
| <b>Time from index date to first PG test, days<br/>[median (25<sup>th</sup>, 75<sup>th</sup>)]</b>                         | 603 (251, 1148)**                 | 597 (270, 1157)**                   |
| <b>Time between PG tests in those with <math>\geq 2</math> tests,<br/>days [median (25<sup>th</sup>, 75<sup>th</sup>)]</b> | 307 (109, 538)*                   | 366 (178, 585)*                     |

Abbreviations: SD: Standard deviation; 25Q: first quartile; 75Q: third quartile

\*p value comparing RA vs. general population <0.0001; \*\*p value = 0.0036

**Supplementary Table 2.** Compliance with PG test for RA individuals stratified by categorical variables.

| <b>Predictive Variable</b>                                    | <b>Categories</b> | <b>Compliance<sup>*</sup></b> |
|---------------------------------------------------------------|-------------------|-------------------------------|
| <b>Sex</b>                                                    | Male              | 70.5%                         |
|                                                               | Female            | 71.9%                         |
| <b>Age<sup>**</sup></b>                                       | 40-50             | 62.4%                         |
|                                                               | 51-60             | 70.4%                         |
|                                                               | 61-70             | 75.3%                         |
|                                                               | 71-80             | 75.3%                         |
|                                                               | 81-90             | 72.3%                         |
|                                                               | 90+               | 57%                           |
| <b>Urban vs Rural</b>                                         | Rural             | 71.5%                         |
|                                                               | Urban             | 71.3%                         |
| <b>Health Authority</b>                                       | Interior          | 70.1%                         |
|                                                               | Fraser            | 73.4%                         |
|                                                               | Coastal           | 70.1%                         |
|                                                               | Island            | 72.5%                         |
|                                                               | Northern          | 69.0%                         |
| <b>SES Index (Quartiles)</b>                                  | Lowest 25%        | 73.6%                         |
|                                                               | 25%-50%           | 70.6%                         |
|                                                               | 50%-75%           | 72.6%                         |
|                                                               | 75%+              | 68.7%                         |
| <b>SES Index, highest quartile vs others</b>                  | Lowest 75%        | 72.3%                         |
|                                                               | Upper 25%         | 68%                           |
| <b>Romano comorbidity score, <math>\geq 1</math> vs 0</b>     | 0                 | 71.6%                         |
|                                                               | 1 and above       | 71.4%                         |
| <b>Having a hospitalization in the prior year<sup>‡</sup></b> | No                | 70.9%                         |

| Predictive Variable                                            | Categories          | Compliance* |
|----------------------------------------------------------------|---------------------|-------------|
| Seeing a rheumatologist in the prior 5 years <sup>††</sup>     | Yes                 | 73.4%       |
|                                                                | No                  | 73.6%       |
|                                                                | Yes                 | 64%         |
| Rate of physician visits in the prior year <sup>‡‡</sup>       | 11 or less visits   | 68.9%       |
|                                                                | More than 11 visits | 74.3%       |
| Timing of periods, starting $\geq$ 2001 vs. <2001 <sup>†</sup> | Before 2001         | 60.6%       |
|                                                                | After2001           | 77.2%       |
| GC use within eligibility period                               | Yes                 | 75.7%       |
|                                                                | No                  | 70.5%       |

Abbreviations: SES: Socioeconomic status; GC: Glucocorticosteroids

\*Compliance measured with periods as the unit of analysis, i.e., as the number of periods with  $\geq 1$  glucose test divided by the number of eligible periods in RA cohort, converted to a percentage.

\*\*Age: Stratified into groups of 10 years, measured at the start of each new period

<sup>†</sup>Compliance per period was stratified according to whether the date at the beginning of the period was before or after 01 Jan 2001.

<sup>††</sup>measured in the 5 years prior to the start of period

<sup>‡</sup>measured in the year prior to start of period

<sup>‡‡</sup> rate of physician visits dichotomized at the median of 11 visits per year per individual
